# Supplementary material for: Probing protein phosphatase substrate binding: affinity pull-down of ILKAP phosphatase 2C with phosphopeptides
Source: Royal Society of Chemistry journal article supplement (doi:10.1039/c2mb05478g), 2012-02-20
Supplement: c2mb05478g.pdf [file c2mb05478g.pdf]

# Probing protein phosphatase substrate binding: Affinity pull-down of ILKAP phosphatase 2C with phosphopeptides

Kim B. Højlys-Larsen<sup>\*a</sup>, Kasper K. Sørensen<sup>a b</sup>, Knud J. Jensen<sup>\*b</sup> and Steen Gammeltoft<sup>a</sup>

Received (in XXX, XXX) Xth XXXXXXXXX 20XX, Accepted Xth XXXXXXXXX 20XX

DOI: 10.1039/b000000x

## Supplementary Information

---

[a] Dr. K. B. Højlys-Larsen, Dr. K. K. Sørensen, Prof. S. Gammeltoft

Department of Clinical Biochemistry  
Glostrup Hospital  
Ndr. Ringvej, 2600 Glostrup, (Denmark)  
Fax: (+45) 38 63 39 58  
E-mail: kimlar01@regionh.dk

[b] Dr. K. K. Sørensen, Prof. K. J. Jensen  
Faculty of Science, University of Copenhagen  
40 Thorvaldsensvej, 1871 Frederiksberg (Denmark)  
E-mail: kjj@life.ku.dk

### Content:

Fig S1: Comparison of pull-down performed at 4°C and 30 °C.

Table S1: Mass spectrometric characterization of phosphopeptides 1-28.

Table S2: Summary of ILKAP pull-down specificity for dephosphorylation targets

Table S3-S7: Western Blot quantification data

**Pull-down reactions were performed at 4 °C to prevent dephosphorylation of the phosphopeptides.**

Integrin-Linked Kinase-Associated Phosphatase (ILKAP) could potentially dephosphorylate the phosphopeptides and thus prevent the intended pull-down reaction. Thus the pull-downs were performed at two temperatures, 4 °C and 30 °C. We speculated that at 4 °C the enzymatic reaction was slowed down and the pull-down should prevail. While performing the reaction at 30 °C – based on the results by Doehn *et al*<sup>1</sup> – would allow ILKAP to dephosphorylate the targets and thus prevent the pull-down.

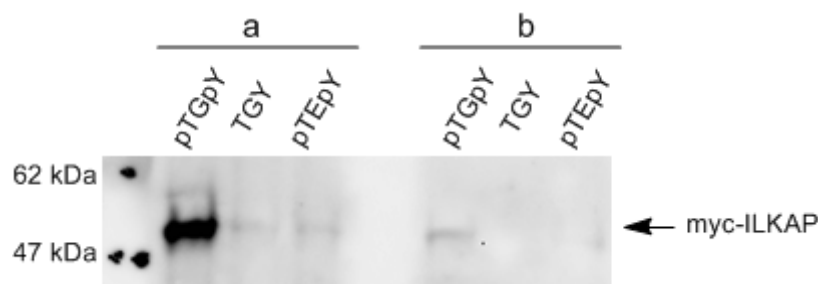

**Fig S1:** Comparison of pull-down performed at 4 °C (a) and 30 °C (b). pTGpY and TGY are motives derived from the mitogen-activated protein kinase 14 (p38). pTEpY is derived from the extracellular-regulated kinase 5 (ERK5).

As it is shown in figure S1, ILKAP is pulled down by the double phosphorylated pTGpY from the mitogen-activated protein kinase 14 (p38) at 4 °C. Whereas the pull-down reaction performed at 30 °C gave a significantly weaker result. To compare, the corresponding unphosphorylated motive from p38 and pTEpY from the extracellular-regulated kinase 5 (ERK5) could only pull-down ILKAP with limited success both at 4 °C and 30 °C. This is in accordance with kinetic studies from the literature, that these two motives acts not as substrates for ILKAP<sup>2</sup>.

From these experiments it was concluded that ILKAP is indeed active and that it does recognize and dephosphorylate the phosphopeptides attached to the solid support. And that the dephosphorylation can be slowed sufficiently down to allow pull-down of the active phosphatase ILKAP by working at 4 °C. Thus all pull-down experiments were performed at 4 °C.

**Table S1.** Synthesized peptides

| Peptide No. | Target protein and phosphor-residue | Sequence                                                                                                   | Elemental composition                                                                          | Calculated MS | Found MS | Assigned                            |
|-------------|-------------------------------------|------------------------------------------------------------------------------------------------------------|------------------------------------------------------------------------------------------------|---------------|----------|-------------------------------------|
| 1           | P38 (180pT, 182pY)                  | Ac-TDDEM <b>p</b> TG <b>p</b> YVATGG-NH <sub>2</sub>                                                       | C <sub>55</sub> H <sub>86</sub> N <sub>14</sub> O <sub>30</sub> P <sub>2</sub> S               | 1516.48       | N. A.    | –                                   |
| 2           | p38 (180T, 182Y)                    | Ac-TDDEM <b>T</b> GYVATGG-NH <sub>2</sub>                                                                  | C <sub>55</sub> H <sub>84</sub> N <sub>14</sub> O <sub>24</sub> S                              | 1356.55       | 1357.4   | [M+H] <sup>+</sup>                  |
| 3           | p38 (180pT)                         | Ac-TDDEM <b>p</b> TGYVATGG-NH <sub>2</sub>                                                                 | C <sub>55</sub> H <sub>85</sub> N <sub>14</sub> O <sub>27</sub> PS                             | 1436.52       | 1458.7   | [M+Na] <sup>+</sup>                 |
| 4           | p38 (182pY)                         | Ac-TDDEM <b>T</b> G <b>p</b> YVATGG-NH <sub>2</sub>                                                        | C <sub>55</sub> H <sub>85</sub> N <sub>14</sub> O <sub>27</sub> PS                             | 1436.52       | 1458.6   | [M+Na] <sup>+</sup>                 |
| 5           | p38 (180pS, 182pY)                  | Ac-TDDEM <b>p</b> S <b>G</b> <b>p</b> YVATGG -NH <sub>2</sub>                                              | C <sub>54</sub> H <sub>84</sub> N <sub>14</sub> O <sub>30</sub> P <sub>2</sub> S               | 1502.47       | N. A.    | –                                   |
| 6           | UNG2 (31pT)                         | Ac-PAVQ <b>G</b> <b>p</b> TGVAGVPGGG-NH <sub>2</sub>                                                       | C <sub>54</sub> H <sub>90</sub> N <sub>17</sub> O <sub>21</sub> P                              | 1343.62       | 1344.8   | [M+H] <sup>+</sup>                  |
| 7           | ERK5 (218pT, 220pY)                 | Ac-HQYF <b>M</b> <b>p</b> T <b>E</b> <b>p</b> YVATRGGG-NH <sub>2</sub>                                     | C <sub>78</sub> H <sub>114</sub> N <sub>22</sub> O <sub>29</sub> P <sub>2</sub> S              | 1916.73       | 1917.2   | [M+H] <sup>+</sup>                  |
| 8           | JNK1 (183pT, 185pY)                 | Ac-TSFMM <b>p</b> T <b>P</b> <b>p</b> YVVTRGGG-NH <sub>2</sub>                                             | C <sub>72</sub> H <sub>115</sub> N <sub>19</sub> O <sub>27</sub> P <sub>2</sub> S <sub>2</sub> | 1803.71       | 1804.5   | [M+H] <sup>+</sup>                  |
| 9           | ATM, (1981pS)                       | Ac-AFE <b>E</b> <b>G</b> <b>p</b> SQSTTIGGG-NH <sub>2</sub>                                                | C <sub>57</sub> H <sub>89</sub> N <sub>16</sub> O <sub>27</sub> P                              | 1460.58       | 1461.7   | [M+H] <sup>+</sup>                  |
| 10          | ATM, (1981S)                        | Ac-AFE <b>E</b> <b>G</b> SQSTTIGGG-NH <sub>2</sub>                                                         | C <sub>57</sub> H <sub>88</sub> N <sub>16</sub> O <sub>24</sub>                                | 1380.62       | 1363.8   | [M-H <sub>2</sub> O+H] <sup>+</sup> |
| 11          | p53 (15pS)                          | Ac-W <b>E</b> <b>P</b> <b>P</b> <b>L</b> <b>p</b> SQ <b>E</b> TFSGGG-NH <sub>2</sub>                       | C <sub>69</sub> H <sub>98</sub> N <sub>17</sub> O <sub>26</sub> P                              | 1612.59       | 1613.5   | [M+H] <sup>+</sup>                  |
| 12          | p53 (15S)                           | Ac-W <b>E</b> <b>P</b> <b>P</b> <b>L</b> SQ <b>E</b> TFSGGG-NH <sub>2</sub>                                | C <sub>69</sub> H <sub>97</sub> N <sub>17</sub> O <sub>23</sub>                                | 1531.69       | 1533.2   | [M+H] <sup>+</sup>                  |
| 13          | Chk1 (345pS)                        | Ac-QG <b>I</b> S <b>F</b> <b>p</b> SQ <b>T</b> CPDGGG-NH <sub>2</sub>                                      | C <sub>62</sub> H <sub>95</sub> N <sub>18</sub> O <sub>26</sub> PS                             | 1570.61       | 1591.8   | [M+Na] <sup>+</sup>                 |
| 14          | Chk1 (345S)                         | Ac-QG <b>I</b> S <b>F</b> SQ <b>T</b> CPDGGG-NH <sub>2</sub>                                               | C <sub>62</sub> H <sub>94</sub> N <sub>18</sub> O <sub>23</sub> S                              | 1490.65       | 1474.0   | [M-H <sub>2</sub> O+H] <sup>+</sup> |
| 15          | Chk2 (68pT)                         | Ac-LET <b>V</b> S <b>p</b> TQ <b>E</b> LYSIPGGG-NH <sub>2</sub>                                            | C <sub>74</sub> H <sub>119</sub> N <sub>18</sub> O <sub>30</sub> P                             | 1770.81       | 1787.0   | [M+O+H] <sup>+</sup> a              |
| 16          | Chk2 (68T)                          | Ac-LET <b>V</b> S <b>T</b> Q <b>E</b> LYSIPGGG-NH <sub>2</sub>                                             | C <sub>74</sub> H <sub>118</sub> N <sub>18</sub> O <sub>27</sub>                               | 1690.84       | 1691.8   | [M+H] <sup>+</sup>                  |
| 17          | Chk2 (387pT)                        | Ac-RT <b>L</b> C <b>G</b> <b>p</b> T <b>P</b> TYLAPEGGG-NH <sub>2</sub>                                    | C <sub>70</sub> H <sub>114</sub> N <sub>21</sub> O <sub>25</sub> PS                            | 1712.76       | 868.6    | [M+Na+H] <sup>2+</sup>              |
| 18          | Chk2 (387T)                         | Ac-RT <b>L</b> C <b>G</b> T <b>P</b> TYLAPEGGG-NH <sub>2</sub>                                             | C <sub>70</sub> H <sub>113</sub> N <sub>21</sub> O <sub>22</sub> S                             | 1632.79       | 1616.0   | [M-H <sub>2</sub> O+H] <sup>+</sup> |
| 19          | Chk2 (516pS)                        | Ac-Q <b>V</b> LA <b>Q</b> <b>p</b> <b>S</b> T <b>S</b> R <b>K</b> R <b>P</b> GGG-NH <sub>2</sub>           | C <sub>70</sub> H <sub>123</sub> N <sub>26</sub> O <sub>25</sub> P                             | 1758.89       | 1759.7   | [M+H] <sup>+</sup>                  |
| 20          | Chk2 (516S)                         | Ac-Q <b>V</b> LA <b>Q</b> <b>P</b> <b>S</b> T <b>S</b> R <b>K</b> R <b>P</b> GGG-NH <sub>2</sub>           | C <sub>70</sub> H <sub>122</sub> N <sub>26</sub> O <sub>22</sub>                               | 1678.92       | 1680.2   | [M+H] <sup>+</sup>                  |
| 21          | RSK2 (227pS)                        | Ac-HE <b>K</b> K <b>A</b> <b>Y</b> <b>p</b> S <b>F</b> C <b>G</b> T <b>V</b> E <b>G</b> GG-NH <sub>2</sub> | C <sub>74</sub> H <sub>112</sub> N <sub>21</sub> O <sub>27</sub> PS                            | 1789.75       | 1772.2   | [M-H <sub>2</sub> O+H] <sup>+</sup> |
| 22          | RSK2 (227S)                         | Ac-HE <b>K</b> K <b>A</b> <b>Y</b> S <b>F</b> C <b>G</b> T <b>V</b> E <b>G</b> GG-NH <sub>2</sub>          | C <sub>74</sub> H <sub>111</sub> N <sub>21</sub> O <sub>24</sub> S                             | 1709.78       | 1692.4   | [M-H <sub>2</sub> O+H] <sup>+</sup> |
| 23          | RSK2 (369pS)                        | Ac-A <b>K</b> T <b>P</b> K <b>D</b> <b>p</b> S <b>P</b> G <b>I</b> P <b>S</b> GGG-NH <sub>2</sub>          | C <sub>65</sub> H <sub>108</sub> N <sub>19</sub> O <sub>25</sub> P                             | 1585.75       | 1570     | [M-H <sub>2</sub> O+H] <sup>+</sup> |
| 24          | RSK2 (369S)                         | Ac-A <b>K</b> T <b>P</b> K <b>D</b> S <b>P</b> G <b>I</b> P <b>S</b> GGG-NH <sub>2</sub>                   | C <sub>65</sub> H <sub>107</sub> N <sub>19</sub> O <sub>22</sub>                               | 1505.78       | 1490     | [M-H <sub>2</sub> O+H] <sup>+</sup> |
| 25          | RSK2 (386pS)                        | Ac-QL <b>F</b> R <b>G</b> <b>F</b> <b>p</b> S <b>F</b> VAITSGGG-NH <sub>2</sub>                            | C <sub>78</sub> H <sub>118</sub> N <sub>21</sub> O <sub>24</sub> P                             | 1763.84       | 1763.7   | [M+H] <sup>+</sup>                  |
| 26          | RSK2 (386S)                         | Ac-QL <b>F</b> R <b>G</b> <b>F</b> S <b>F</b> VAITSGGG-NH <sub>2</sub>                                     | C <sub>78</sub> H <sub>117</sub> N <sub>21</sub> O <sub>21</sub>                               | 1683.87       | 1684.2   | [M+H] <sup>+</sup>                  |
| 27          | RSK2 (577pT)                        | Ac-EN <b>G</b> L <b>L</b> <b>M</b> <b>p</b> S <b>P</b> C <b>T</b> ANGGG-NH <sub>2</sub>                    | C <sub>67</sub> H <sub>106</sub> N <sub>19</sub> O <sub>27</sub> PS <sub>2</sub>               | 1703.67       | 1722.4   | [M+H <sub>2</sub> O+H] <sup>+</sup> |
| 28          | RSK2 (577T)                         | Ac-EN <b>G</b> L <b>L</b> <b>M</b> S <b>P</b> C <b>T</b> ANGGG-NH <sub>2</sub>                             | C <sub>67</sub> H <sub>105</sub> N <sub>19</sub> O <sub>24</sub> S <sub>2</sub>                | 1623.70       | 1623.8   | [M+H] <sup>+</sup>                  |

<sup>a</sup> [M+NH<sub>2</sub>+H]

**Table S2.** Summary of ILKAP pull-down specificity for dephosphorylation targets

---

| <b>Peptide No.</b> | <b>ILKAP target</b> | <b>ILKAP pull-down</b> |
|--------------------|---------------------|------------------------|
| 1                  | p38 (180pT, 182pY)  | Strong                 |
| 2                  | p38 (180T, 182Y)    | Weak                   |
| 3                  | p38 (180pT)         | Medium                 |
| 4                  | p38 (182pY)         | Weak                   |
| 5                  | p38 (180pS, 182pY)  | Strong                 |
| 6                  | UNG2 (31pT)         | Weak                   |
| 7                  | ERK5 (218pT, 220pY) | Weak                   |
| 8                  | JNK1 (183pT, 185pY) | Strong                 |
| 9                  | ATM, (1981pS)       | Strong                 |
| 10                 | ATM, (1981S)        | Weak                   |
| 11                 | p53 (15pS)          | Medium                 |
| 12                 | p53 (15S)           | Weak                   |
| 13                 | Chk1 (345pS)        | Strong                 |
| 14                 | Chk1 (345S)         | Weak                   |
| 15                 | Chk2 (68pT)         | Medium                 |
| 16                 | Chk2 (68T)          | Weak                   |
| 17                 | Chk2 (387pT)        | Weak                   |
| 18                 | Chk2 (387T)         | Weak                   |
| 19                 | Chk2 (516pS)        | Weak                   |
| 20                 | Chk2 (516S)         | Weak                   |
| 21                 | RSK2 (227pS)        | Medium                 |
| 22                 | RSK2 (227S)         | Weak                   |
| 23                 | RSK2 (369pS)        | Weak                   |
| 24                 | RSK2 (369S)         | Weak                   |
| 25                 | RSK2 (386pS)        | Strong                 |
| 26                 | RSK2 (386S)         | Weak                   |
| 27                 | RSK2 (577pT)        | Medium                 |
| 28                 | RSK2 (577S)         | Weak                   |

---

### Notes to Tables S3-S7.

Figures 2 to 7 in the paper show quantification of several pull-downs prepared with the same set of phosphopeptides. These were normalized to the highest value in the individual experiment. To show that this is a valid procedure, some of the pull-down experiments were quantified to the pull-down efficiency of one sequence, sequence 7 (ERK5 (218pT, 220pY)).

Comparing the results from the 2 sets of quantifications (table 3A-B; 4A-B; 5A-B and 6A-B), each show the same relative relationship between the pull-down reactions, thus supporting the quantification used in the manuscript.

**Table S3A.**

| Peptide No | Sample | AU      | Area (mm <sup>2</sup> ) | AU/mm <sup>2</sup> | (A-B)/mm <sup>2</sup> | Relative to 7 |
|------------|--------|---------|-------------------------|--------------------|-----------------------|---------------|
| 1          | pTGpY  | 657455  | 10.35                   | 63491.8            | 7392.21               | 1.202476      |
| 2          | TGY    | 611152  | 10.35                   | 59020.22           | 2920.63               | 0.475093      |
| 3          | pTGY   | 607300  | 10.35                   | 58648.22           | 2548.63               | 0.414581      |
| 4          | TGpY   | 621181  | 10.35                   | 59988.74           | 3889.15               | 0.63264       |
| 5          | pSGpY  | 603484  | 10.35                   | 58279.7            | 2180.11               | 0.354634      |
| 7 (ERK5)   | pTEpY  | 644566  | 10.35                   | 62247.08           | 6147.49               | 1             |
|            | BckGrn | 580909  | 10.35                   | 56099.59           | -----                 |               |
| Peptide No | Sample | AU      | Area (mm <sup>2</sup> ) | AU/mm <sup>2</sup> | (A-B)/mm <sup>2</sup> | Relative to 7 |
| 1          | pTGpY  | 828093  | 13.56                   | 61088.7            | 59155.62              | 2.069861      |
| 2          | TGY    | 144359  | 13.56                   | 10649.41           | 8716.33               | 0.304985      |
| 3          | pTGY   | 559123  | 13.56                   | 41246.69           | 39313.61              | 1.375587      |
| 4          | TGpY   | 637554  | 13.56                   | 47032.57           | 45099.5               | 1.578036      |
| 5          | pSGpY  | 1184636 | 13.56                   | 87391              | 85457.92              | 2.990181      |
| 7 (ERK5)   | pTEpY  | 413616  | 13.56                   | 30512.59           | 28579.51              | 1             |
|            | BckGrn | 26204   | 13.56                   | 1933.08            | -----                 |               |
| Peptide No | Sample | AU      | Area (mm <sup>2</sup> ) | AU/mm <sup>2</sup> | (A-B)/mm <sup>2</sup> | Relative to 7 |
| 1          | pTGpY  | 214277  | 5.14                    | 41656.85           | 1499.46               | 4.9982        |
| 2          | TGY    | 208467  | 5.14                    | 40527.35           | 369.96                | 1.2332        |
| 3          | pTGY   | 212604  | 5.14                    | 41331.61           | 1174.22               | 3.914067      |
| 4          | TGpY   | 220900  | 5.14                    | 42944.4            | 2787.01               | 9.290033      |
| 5          | pSGpY  | 225954  | 5.14                    | 43926.93           | 3769.54               | 12.56513      |
| 7 (ERK5)   | pTEpY  | 204139  | 5.14                    | 39685.96           | 300                   | 1             |
|            | BckGrn | 206564  | 5.14                    | 40157.39           | -----                 |               |
| Peptide No | Sample | AU      | Area (mm <sup>2</sup> ) | AU/mm <sup>2</sup> | (A-B)/mm <sup>2</sup> | Relative to 7 |
| 1          | pTGpY  | 221440  | 5.14                    | 43049.38           | 2855.44               | 3.345801      |
| 2          | TGY    | 209517  | 5.14                    | 40731.47           | 537.53                | 0.629839      |
| 3          | pTGY   | 216655  | 5.14                    | 42119.15           | 1925.21               | 2.255823      |
| 4          | TGpY   | 238116  | 5.14                    | 46291.31           | 6097.37               | 7.144462      |
| 5          | pSGpY  | 237887  | 4.98                    | 47744.66           | 7550.72               | 8.847394      |
| 7 (ERK5)   | pTEpY  | 211142  | 5.14                    | 41047.38           | 853.44                | 1             |
|            | BckGrn | 206752  | 5.14                    | 40193.94           | -----                 |               |
| Peptide No | Sample | AU      | Area (mm <sup>2</sup> ) | AU/mm <sup>2</sup> | (A-B)/mm <sup>2</sup> | Relative to 7 |
| 1          | pTGpY  | 385598  | 16.14                   | 23894.38           | 23345.97              | 14.88474      |
| 2          | TGY    | 16397   | 16.14                   | 1016.07            | 467.67                | 0.298173      |
| 3          | pTGY   | 124646  | 16.14                   | 7723.95            | 7175.54               | 4.574924      |
| 4          | TGpY   | 41822   | 16.14                   | 2591.59            | 2043.18               | 1.302675      |
| 5          | pSGpY  | 429842  | 16.14                   | 26636.05           | 26087.65              | 16.63276      |
| 7 (ERK5)   | pTEpY  | 34161   | 16.14                   | 2116.86            | 1568.45               | 1             |
|            | BckGrn | 8850    | 16.14                   | 548.41             | -----                 |               |

Sum of experiments in table 2A

| Peptide No | Sample | Average  | SD       | SEM      |
|------------|--------|----------|----------|----------|
| 1          | pTGpY  | 5.300216 | 4.959853 | 2.218082 |
| 2          | TGY    | 0.588258 | 0.344928 | 0.154254 |
| 3          | pTGY   | 2.506996 | 1.547744 | 0.692162 |
| 4          | TGpY   | 3.989569 | 3.531349 | 1.579245 |
| 5          | pSGpY  | 8.27802  | 5.987428 | 2.677621 |
| 7 (ERK5)   | Seq. 7 | 1        | 0        | 0        |

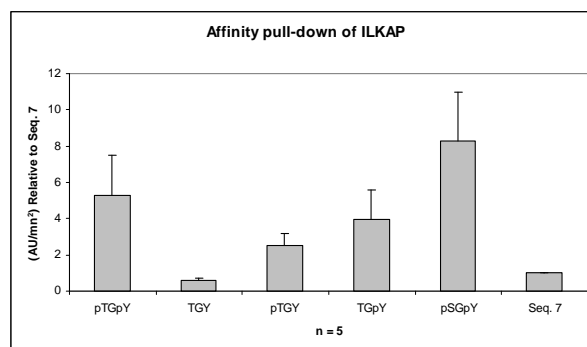

**Table S3B.**

| Sample | AU      | Area (mm <sup>2</sup> ) | AU/mm <sup>2</sup> | (A-B)/mm <sup>2</sup> | %         |
|--------|---------|-------------------------|--------------------|-----------------------|-----------|
| pTGpY  | 828093  | 13.56                   | 61088.7            | 59155.62              | 69.221928 |
| TGY    | 144359  | 13.56                   | 10649.41           | 8716.33               | 10.199558 |
| pTGY   | 559123  | 13.56                   | 41246.69           | 39313.61              | 46.003472 |
| TGpY   | 637554  | 13.56                   | 47032.57           | 45099.5               | 52.773927 |
| PSGpY  | 1184636 | 13.56                   | 87391              | 85457.92              | 100       |
| BckGrn | 26204   | 13.56                   | 1933.08            | -----                 |           |

| Sample | AU     | Area (mm <sup>2</sup> ) | AU/mm <sup>2</sup> | (A-B)/mm <sup>2</sup> | %         |
|--------|--------|-------------------------|--------------------|-----------------------|-----------|
| pTGpY  | 214277 | 5.14                    | 41656.85           | 1499.46               | 39.778328 |
| TGY    | 208467 | 5.14                    | 40527.35           | 369.96                | 9.8144601 |
| pTGY   | 212604 | 5.14                    | 41331.61           | 1174.22               | 31.15022  |
| TGpY   | 220900 | 5.14                    | 42944.4            | 2787.01               | 73.935016 |
| PSGpY  | 225954 | 5.14                    | 43926.93           | 3769.54               | 100       |
| BckGrn | 206564 | 5.14                    | 40157.39           | -----                 |           |

| Sample | AU     | Area (mm <sup>2</sup> ) | AU/mm <sup>2</sup> | (A-B)/mm <sup>2</sup> | %         |
|--------|--------|-------------------------|--------------------|-----------------------|-----------|
| pTGpY  | 221440 | 5.14                    | 43049.38           | 2855.44               | 37.816791 |
| TGY    | 209517 | 5.14                    | 40731.47           | 537.53                | 7.1189238 |
| pTGY   | 216655 | 5.14                    | 42119.15           | 1925.21               | 25.497039 |
| TGpY   | 238116 | 5.14                    | 46291.31           | 6097.37               | 80.752167 |
| PSGpY  | 237887 | 4.98                    | 47744.66           | 7550.72               | 100       |
| BckGrn | 206752 | 5.14                    | 40193.94           | -----                 |           |

| Sample | AU     | Area (mm <sup>2</sup> ) | AU/mm <sup>2</sup> | (A-B)/mm <sup>2</sup> | %         |
|--------|--------|-------------------------|--------------------|-----------------------|-----------|
| pTGpY  | 385598 | 16.14                   | 23894.38           | 23345.97              | 89.490506 |
| TGY    | 16397  | 16.14                   | 1016.07            | 467.67                | 1.7926873 |
| pTGY   | 124646 | 16.14                   | 7723.95            | 7175.54               | 27.505505 |
| TGpY   | 41822  | 16.14                   | 2591.59            | 2043.18               | 7.8319818 |
| PSGpY  | 429842 | 16.14                   | 26636.05           | 26087.65              | 100       |
| BckGrn | 8850   | 16.14                   | 548.41             | -----                 |           |

**Sum of experiments in table 2B**

| Sample | Average  | SD         | SEM         |
|--------|----------|------------|-------------|
| pTGpY  | 59.07689 | 21.5193874 | 10.75969368 |
| TGY    | 7.231407 | 3.3568738  | 1.678436902 |
| pTGY   | 32.53906 | 8.03346116 | 4.016730582 |
| TGpY   | 53.82327 | 28.4866088 | 14.24330438 |
| PSGpY  | 100      | 7.1054E-15 | 3.55271E-15 |

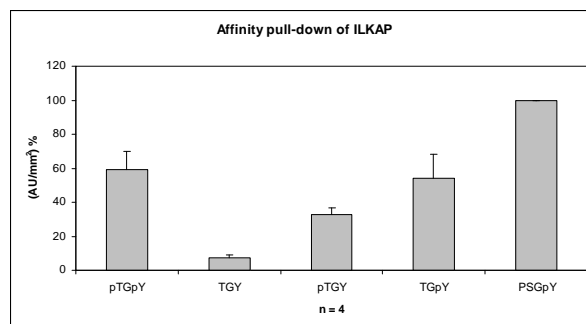

**Table S4A.**

| Peptide No | Sample              | AU     | Area (mm <sup>2</sup> ) | AU/mm <sup>2</sup> | (A-B)/mm <sup>2</sup> | Relative to 7 |
|------------|---------------------|--------|-------------------------|--------------------|-----------------------|---------------|
| 6          | UNG2 (31pT)         | 161188 | 13.56                   | 11890.89           | 9957.82               | 0.348425148   |
| 7          | ERK5 (218pT, 220pY) | 413616 | 13.56                   | 30512.59           | 28579.51              | 1             |
| 8          | JNK1 (183pT, 185pY) | 869982 | 13.56                   | 64178.87           | 62245.79              | 2.177986606   |
|            | BckGrn              | 26204  | 13.56                   | 1933.08            | -----                 |               |

  

| Peptide No | Sample              | AU     | Area (mm <sup>2</sup> ) | AU/mm <sup>2</sup> | (A-B)/mm <sup>2</sup> | Relative to 7 |
|------------|---------------------|--------|-------------------------|--------------------|-----------------------|---------------|
| 7          | ERK5 (218pT, 220pY) | 211142 | 5.14                    | 41047.38           | 853.44                | 1             |
| 8          | JNK1 (183pT, 185pY) | 812878 | 10.33                   | 78654.54           | 38460.6               | 45.06538245   |
|            | BckGrn              | 206752 | 5.14                    | 40193.94           | -----                 |               |

  

| Peptide No | Sample              | AU     | Area (mm <sup>2</sup> ) | AU/mm <sup>2</sup> | (A-B)/mm <sup>2</sup> | Relative to 7 |
|------------|---------------------|--------|-------------------------|--------------------|-----------------------|---------------|
| 6          | UNG2 (31pT)         | 33957  | 16.14                   | 2104.22            | 1555.81               | 0.991941088   |
| 7          | ERK5 (218pT, 220pY) | 34161  | 16.14                   | 2116.86            | 1568.45               | 1             |
| 8          | JNK1 (183pT, 185pY) | 574265 | 16.14                   | 35585.53           | 35037.12              | 22.33869106   |
|            | BckGrn              | 8850   | 16.14                   | 548.41             | -----                 |               |

  

| Peptide No | Sample              | AU     | Area (mm <sup>2</sup> ) | AU/mm <sup>2</sup> | (A-B)/mm <sup>2</sup> | Relative to 7 |
|------------|---------------------|--------|-------------------------|--------------------|-----------------------|---------------|
| 6          | UNG2 (31pT)         | 459340 | 9.09                    | 50527.74           | 7660.34               | 2.589772543   |
| 7          | ERK5 (218pT, 220pY) | 416591 | 9.09                    | 45825.32           | 2957.92               | 1             |
| 8          | JNK1 (183pT, 185pY) | 693426 | 9.09                    | 76277.37           | 33409.97              | 11.29508912   |
|            | BckGrn              | 389701 | 9.09                    | 42867.4            | -----                 |               |

**Sum of experiments**

| Peptide No | Sample              | Average     | SD       | SEM      |
|------------|---------------------|-------------|----------|----------|
| 6          | UNG2 (31pT)         | 1.31004626  | 0.942268 | 0.544003 |
| 7          | Seq. 7              | 1           | 0        | 0        |
| 8          | JNK1 (183pT, 185pY) | 20.21928731 | 16.02303 | 8.011516 |

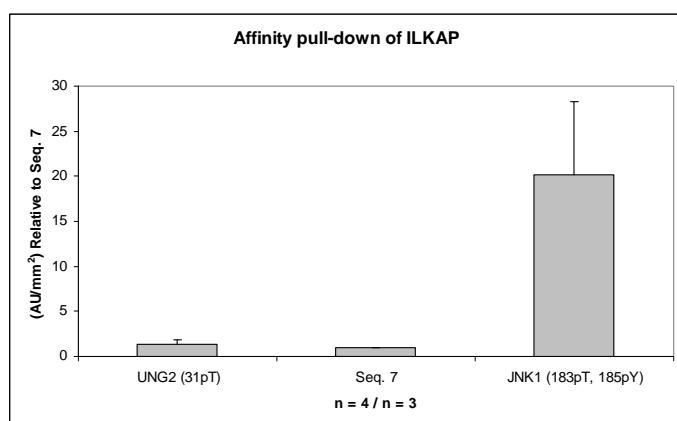



**Table S4B.**

| Sample              | AU     | Area (mm <sup>2</sup> ) | AU/mm <sup>2</sup> | (A-B)/mm <sup>2</sup> | %        |
|---------------------|--------|-------------------------|--------------------|-----------------------|----------|
| UNG2 (31pT)         | 161188 | 13.56                   | 11890.89           | 9957.82               | 15.99758 |
| ERK5 (218pT, 220pY) | 413616 | 13.56                   | 30512.59           | 28579.51              | 45.91396 |
| JNK1 (183pT, 185pY) | 869982 | 13.56                   | 64178.87           | 62245.79              | 100      |
| BckGrn              | 26204  | 13.56                   | 1933.08            | -----                 |          |

  

| Sample              | AU     | Area (mm <sup>2</sup> ) | AU/mm <sup>2</sup> | (A-B)/mm <sup>2</sup> | %        |
|---------------------|--------|-------------------------|--------------------|-----------------------|----------|
| ERK5 (218pT, 220pY) | 211142 | 5.14                    | 41047.38           | 853.44                | 2.218998 |
| JNK1 (183pT, 185pY) | 812878 | 10.33                   | 78654.54           | 38460.6               | 100      |
| BckGrn              | 206752 | 5.14                    | 40193.94           | -----                 |          |

  

| Sample              | AU     | Area (mm <sup>2</sup> ) | AU/mm <sup>2</sup> | (A-B)/mm <sup>2</sup> | %        |
|---------------------|--------|-------------------------|--------------------|-----------------------|----------|
| UNG2 (31pT)         | 33957  | 16.14                   | 2104.22            | 1555.81               | 4.440462 |
| ERK5 (218pT, 220pY) | 34161  | 16.14                   | 2116.86            | 1568.45               | 4.476538 |
| JNK1 (183pT, 185pY) | 574265 | 16.14                   | 35585.53           | 35037.12              | 100      |
| BckGrn              | 8850   | 16.14                   | 548.41             | -----                 |          |

  

| Sample              | AU     | Area (mm <sup>2</sup> ) | AU/mm <sup>2</sup> | (A-B)/mm <sup>2</sup> | %        |
|---------------------|--------|-------------------------|--------------------|-----------------------|----------|
| UNG2 (31pT)         | 459340 | 9.09                    | 50527.74           | 7660.34               | 22.92831 |
| ERK5 (218pT, 220pY) | 416591 | 9.09                    | 45825.32           | 2957.92               | 8.853405 |
| JNK1 (183pT, 185pY) | 693426 | 9.09                    | 76277.37           | 33409.97              | 100      |
| BckGrn              | 389701 | 9.09                    | 42867.4            | -----                 |          |

**Sum of experiments**

| Sample              | Average  | SD          | SEM      |
|---------------------|----------|-------------|----------|
| UNG2 (31pT)         | 14.45545 | 7.625995676 | 3.812998 |
| ERK5 (218pT, 220pY) | 15.36573 | 17.79758463 | 8.898792 |
| JNK1 (183pT, 185pY) | 100      | 7.10543E-15 | 3.55E-15 |

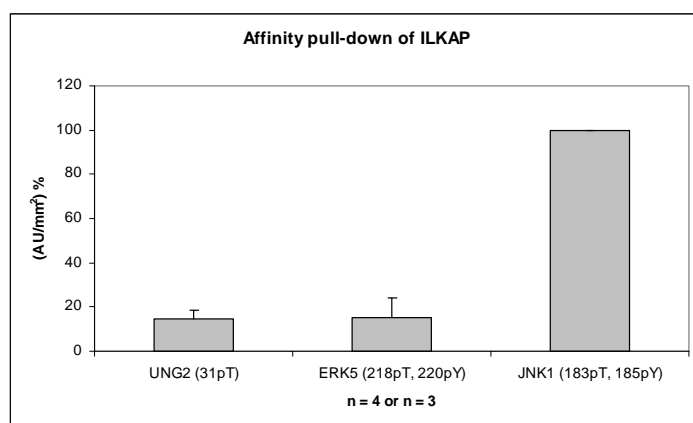

**Table S5A.**

| Peptide No | Sample        | AU      | Area (mm <sup>2</sup> ) | AU/mm <sup>2</sup> | (A-B)/mm <sup>2</sup> | Relative to 7 |
|------------|---------------|---------|-------------------------|--------------------|-----------------------|---------------|
| 9          | ATM, (1981pS) | 661685  | 9.09                    | 72785.84           | 29918.44              | 10.1146887    |
| 10         | ATM, (1981S)  | 456180  | 9.09                    | 50180.14           | 7312.74               | 2.472257532   |
| 11         | p53 (15pS)    | 485315  | 9.09                    | 53385.01           | 10517.61              | 3.555745253   |
| 12         | p53 (15S)     | 551783  | 9.09                    | 60696.54           | 17829.14              | 6.027593715   |
| 13         | Chk1 (345pS)  | 550700  | 9.09                    | 60577.41           | 17710.01              | 5.987318792   |
| 14         | Chk1 (345S)   | 429887  | 9.09                    | 47287.89           | 4420.49               | 1.494458944   |
| 7          | ERK5 (pTEpY)  | 416591  | 9.09                    | 45825.32           | 2957.92               | 1             |
|            | BckGrn        | 389701  | 9.09                    | 42867.4            | -----                 |               |
| Peptide No | Sample        | AU      | Area (mm <sup>2</sup> ) | AU/mm <sup>2</sup> | (A-B)/mm <sup>2</sup> | Relative to 7 |
| 9          | ATM, (1981pS) | 1146193 | 13.56                   | 84555.04           | 82621.97              | 2.890951244   |
| 10         | ATM, (1981S)  | 901198  | 13.56                   | 66481.68           | 64548.6               | 2.258562166   |
| 11         | p53 (15pS)    | 897951  | 13.56                   | 66242.15           | 64309.07              | 2.250180986   |
| 12         | p53 (15S)     | 57914   | 13.56                   | 4272.34            | 2339.26               | 0.081850948   |
| 7          | ERK5 (pTEpY)  | 413616  | 13.56                   | 30512.59           | 28579.51              | 1             |
|            | BckGrn        | 26204   | 13.56                   | 1933.08            | -----                 |               |
| Peptide No | Sample        | AU      | Area (mm <sup>2</sup> ) | AU/mm <sup>2</sup> | (A-B)/mm <sup>2</sup> | Relative to 7 |
| 9          | ATM, (1981pS) | 259986  | 16.14                   | 16110.57           | 15562.17              | 9.922005802   |
| 10         | ATM, (1981S)  | 189203  | 16.14                   | 11724.36           | 11175.95              | 7.125474194   |
| 11         | p53 (15pS)    | 301914  | 16.14                   | 18708.73           | 18160.32              | 11.57851382   |
| 12         | p53 (15S)     | 11039   | 16.14                   | 684.05             | 135.65                | 0.086486659   |
| 7          | ERK5 (pTEpY)  | 34161   | 16.14                   | 2116.86            | 1568.45               | 1             |
|            | BckGrn        | 8850    | 16.14                   | 548.41             | -----                 |               |
| Peptide No | Sample        | AU      | Area (mm <sup>2</sup> ) | AU/mm <sup>2</sup> | (A-B)/mm <sup>2</sup> | Relative to 7 |
| 9          | ATM, (1981pS) | 506123  | 10.76                   | 47044.45           | 8153.35               | 4.977138985   |
| 10         | ATM, (1981S)  | 474464  | 10.76                   | 44101.73           | 5210.63               | 3.180782097   |
| 11         | p53 (15pS)    | 477651  | 10.76                   | 44397.96           | 5506.86               | 3.361613029   |
| 12         | p53 (15S)     | 463371  | 10.76                   | 43070.62           | 4179.52               | 2.551350295   |
| 13         | Chk1 (345pS)  | 534004  | 10.76                   | 49636.01           | 10744.91              | 6.559133418   |
| 14         | Chk1 (345S)   | 451352  | 10.76                   | 41953.45           | 3062.35               | 1.869383943   |
| 7          | ERK5 (pTEpY)  | 436030  | 10.76                   | 40529.26           | 1638.16               | 1             |
|            | BckGrn        | 418406  | 10.76                   | 38891.1            | -----                 |               |

**Sum of experiments**

| Peptide No | Sample        | Average  | SD       | SEM      |
|------------|---------------|----------|----------|----------|
| 9          | ATM, (1981pS) | 6.976196 | 3.13103  | 1.565515 |
| 10         | ATM, (1981S)  | 3.759269 | 1.973227 | 0.986614 |
| 11         | p53 (15pS)    | 5.186513 | 3.723889 | 1.861944 |
| 12         | p53 (15S)     | 2.18682  | 2.435504 | 1.217752 |
| 13         | Chk1 (345pS)  | 6.273226 | 0.285907 | 0.202169 |
| 14         | Chk1 (345S)   | 1.681921 | 0.187462 | 0.132557 |
| 7          | Seq. 7        | 1        | 0        | 0        |

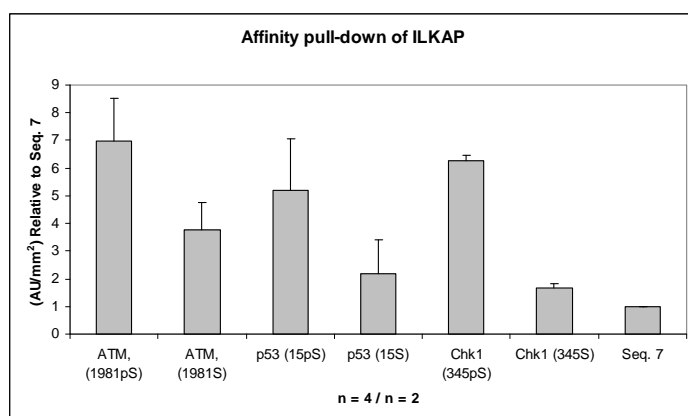

**Table S5B.**

| Sample        | AU     | Area (mm <sup>2</sup> ) | AU/mm <sup>2</sup> | (A-B)/mm <sup>2</sup> | %        |
|---------------|--------|-------------------------|--------------------|-----------------------|----------|
| ATM, (1981pS) | 661685 | 9.09                    | 72785.84           | 29918.44              | 100      |
| ATM, (1981S)  | 456180 | 9.09                    | 50180.14           | 7312.74               | 24.44225 |
| p53 (15pS)    | 485315 | 9.09                    | 53385.01           | 10517.61              | 35.15427 |
| p53 (15S)     | 551783 | 9.09                    | 60696.54           | 17829.14              | 59.59248 |
| Chk1 (345pS)  | 550700 | 9.09                    | 60577.41           | 17710.01              | 59.1943  |
| Chk1 (345S)   | 429887 | 9.09                    | 47287.89           | 4420.49               | 14.77514 |
| BckGrn        | 389701 | 9.09                    | 42867.4            | -----                 |          |

| Sample        | AU      | Area (mm <sup>2</sup> ) | AU/mm <sup>2</sup> | (A-B)/mm <sup>2</sup> | %        |
|---------------|---------|-------------------------|--------------------|-----------------------|----------|
| ATM, (1981pS) | 1146193 | 13.56                   | 84555.04           | 82621.97              | 100      |
| ATM, (1981S)  | 901198  | 13.56                   | 66481.68           | 64548.6               | 78.12523 |
| p53 (15pS)    | 897951  | 13.56                   | 66242.15           | 64309.07              | 77.83531 |
| p53 (15S)     | 57914   | 13.56                   | 4272.34            | 2339.26               | 2.831281 |
| BckGrn        | 26204   | 13.56                   | 1933.08            | -----                 |          |

| Sample        | AU     | Area (mm <sup>2</sup> ) | AU/mm <sup>2</sup> | (A-B)/mm <sup>2</sup> | %        |
|---------------|--------|-------------------------|--------------------|-----------------------|----------|
| ATM, (1981pS) | 259986 | 16.14                   | 16110.57           | 15562.17              | 85.69326 |
| ATM, (1981S)  | 189203 | 16.14                   | 11724.36           | 11175.95              | 61.54049 |
| p53 (15pS)    | 301914 | 16.14                   | 18708.73           | 18160.32              | 100      |
| p53 (15S)     | 11039  | 16.14                   | 684.05             | 135.65                | 0.746958 |
| BckGrn        | 8850   | 16.14                   | 548.41             | -----                 |          |

| Sample        | AU     | Area (mm <sup>2</sup> ) | AU/mm <sup>2</sup> | (A-B)/mm <sup>2</sup> | %        |
|---------------|--------|-------------------------|--------------------|-----------------------|----------|
| ATM, (1981pS) | 506123 | 10.76                   | 47044.45           | 8153.35               | 75.88105 |
| ATM, (1981S)  | 474464 | 10.76                   | 44101.73           | 5210.63               | 48.49394 |
| p53 (15pS)    | 477651 | 10.76                   | 44397.96           | 5506.86               | 51.25087 |
| p53 (15S)     | 463371 | 10.76                   | 43070.62           | 4179.52               | 38.89767 |
| Chk1 (345pS)  | 534004 | 10.76                   | 49636.01           | 10744.91              | 100      |
| Chk1 (345S)   | 451352 | 10.76                   | 41953.45           | 3062.35               | 28.50047 |
| BckGrn        | 418406 | 10.76                   | 38891.1            | -----                 |          |

**Sum of experiments**

| Sample        | Average  | SD          | SEM      |
|---------------|----------|-------------|----------|
| ATM, (1981pS) | 90.39358 | 10.21363428 | 5.106817 |
| ATM, (1981S)  | 53.15048 | 19.62126397 | 9.810632 |
| p53 (15pS)    | 66.06011 | 24.82466462 | 12.41233 |
| p53 (15S)     | 25.5171  | 24.84138431 | 12.42069 |
| Chk1 (345pS)  | 79.59715 | 20.40285189 | 10.20143 |
| Chk1 (345S)   | 21.6378  | 6.862668026 | 3.431334 |

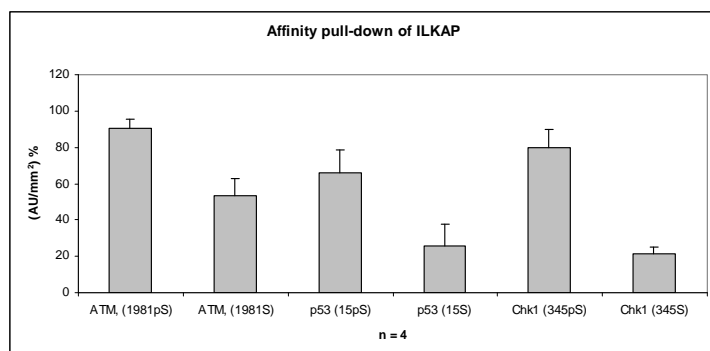

**Table S6A.**

| Sample              | AU     | Area (mm <sup>2</sup> ) | AU/mm <sup>2</sup> | (A-B)/mm <sup>2</sup> | Relative to 7 |
|---------------------|--------|-------------------------|--------------------|-----------------------|---------------|
| Chk2 (68pT)         | 459136 | 9.09                    | 50505.3            | 7637.9                | 2.582186131   |
| Chk2 (68T)          | 416604 | 9.09                    | 45826.75           | 2959.35               | 1.000483448   |
| Chk2 (387pT)        | 419705 | 9.09                    | 46167.86           | 3300.46               | 1.115804349   |
| Chk2 (387T)         | 408614 | 9.09                    | 44947.84           | 2080.44               | 0.703345594   |
| Chk2 (516S)         | 462715 | 8                       | 57828.1            | 14960.7               | 5.057844702   |
| ERK5 (218pT, 220pY) | 416591 | 9.09                    | 45825.32           | 2957.92               | 1             |
| BckGrn              | 389701 | 9.09                    | 42867.4            | -----                 |               |

| Sample              | AU     | Area (mm <sup>2</sup> ) | AU/mm <sup>2</sup> | (A-B)/mm <sup>2</sup> | Relative to 7 |
|---------------------|--------|-------------------------|--------------------|-----------------------|---------------|
| Chk2 (68pT)         | 454071 | 10.76                   | 42206.18           | 3315.08               | 2.023660692   |
| Chk2 (68T)          | 443335 | 10.76                   | 41208.27           | 2317.17               | 1.414495532   |
| Chk2 (387pT)        | 420823 | 10.76                   | 39115.76           | 224.66                | 0.137141671   |
| Chk2 (387T)         | 477208 | 10.76                   | 44356.78           | 5465.68               | 3.33647507    |
| Chk2 (516pS)        | 457609 | 10.76                   | 42535.04           | 3643.94               | 2.224410314   |
| Chk2 (516S)         | 566259 | 11.38                   | 49772.22           | 10881.13              | 6.642287689   |
| ERK5 (218pT, 220pY) | 436030 | 10.76                   | 40529.26           | 1638.16               | 1             |
| BckGrn              | 418406 | 10.76                   | 38891.1            | -----                 |               |

**Sum of experiments**

| Peptide No | Sample       | Average  | SD       | SEM      |
|------------|--------------|----------|----------|----------|
| 15         | Chk2 (68pT)  | 2.302923 | 0.279263 | 0.161228 |
| 16         | Chk2 (68T)   | 1.207489 | 0.207006 | 0.119512 |
| 17         | Chk2 (387pT) | 0.626473 | 0.489331 | 0.282508 |
| 18         | Chk2 (387T)  | 2.01991  | 1.316565 | 0.760097 |
| 19         | Chk2 (516pS) | 2.22441  | 0        | 0        |
| 20         | Chk2 (516S)  | 5.850066 | 3.054673 | 1.763566 |
| 7          | Seq. 7       | 1        | 0        | 0        |

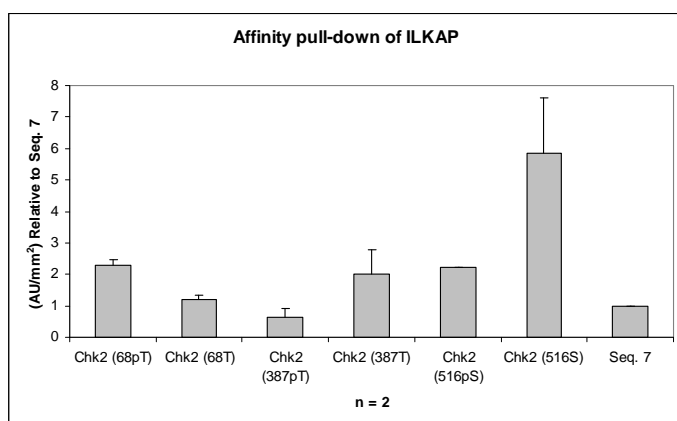

**Table S6B.**

| Sample       | AU     | Area (mm <sup>2</sup> ) | AU/mm <sup>2</sup> | (A-B)/mm <sup>2</sup> | %        |
|--------------|--------|-------------------------|--------------------|-----------------------|----------|
| Chk2 (68pT)  | 459136 | 9.09                    | 50505.3            | 7637.9                | 51.05309 |
| Chk2 (68T)   | 416604 | 9.09                    | 45826.75           | 2959.35               | 19.78083 |
| Chk2 (387pT) | 419705 | 9.09                    | 46167.86           | 3300.46               | 22.06087 |
| Chk2 (516pS) | 408614 | 9.09                    | 44947.84           | 2080.44               | 13.90603 |
| Chk2 (516S)  | 462715 | 8                       | 57828.1            | 14960.7               | 100      |
| BckGrn       | 389701 | 9.09                    | 42867.4            | -----                 |          |

| Sample       | AU     | Area (mm <sup>2</sup> ) | AU/mm <sup>2</sup> | (A-B)/mm <sup>2</sup> | %        |
|--------------|--------|-------------------------|--------------------|-----------------------|----------|
| Chk2 (68pT)  | 454071 | 10.76                   | 42206.18           | 3315.08               | 30.46632 |
| Chk2 (68T)   | 443335 | 10.76                   | 41208.27           | 2317.17               | 21.29531 |
| Chk2 (387pT) | 420823 | 10.76                   | 39115.76           | 224.66                | 2.064675 |
| Chk2 (387T)  | 477208 | 10.76                   | 44356.78           | 5465.68               | 50.23081 |
| Chk2 (516pS) | 457609 | 10.76                   | 42535.04           | 3643.94               | 33.48862 |
| Chk2 (516S)  | 566259 | 11.38                   | 49772.22           | 10881.13              | 100      |
| BckGrn       | 418406 | 10.76                   | 38891.1            | -----                 |          |

| Sample       | AU    | Area (mm <sup>2</sup> ) | AU/mm <sup>2</sup> | (A-B)/mm <sup>2</sup> | %        |
|--------------|-------|-------------------------|--------------------|-----------------------|----------|
| Chk2 (68pT)  | 92776 | 16.95                   | 5472.85            | 5078.62               | 100      |
| Chk2 (68T)   | 16902 | 16.95                   | 997.05             | 602.82                | 11.86976 |
| Chk2 (387pT) | 9305  | 16.95                   | 548.9              | 154.67                | 3.045512 |
| Chk2 (387T)  | 16480 | 16.95                   | 972.15             | 577.92                | 11.37947 |
| Chk2 (516pS) | 34206 | 16.95                   | 2017.81            | 1623.58               | 31.96892 |
| Chk2 (516S)  | 42611 | 16.95                   | 2513.62            | 2119.39               | 41.73161 |
| BckGrn       | 6683  | 16.95                   | 394.23             | -----                 |          |

**Sum of experiments**

| Sample       | Average  | SD          | SEM      |
|--------------|----------|-------------|----------|
| Chk2 (68pT)  | 60.50647 | 29.16342348 | 16.83703 |
| Chk2 (68T)   | 17.64863 | 4.132789575 | 2.385999 |
| Chk2 (387pT) | 9.057018 | 9.203823902 | 5.313679 |
| Chk2 (387T)  | 30.80514 | 19.4256716  | 11.2151  |
| Chk2 (516pS) | 26.45452 | 8.894785881 | 5.135261 |
| Chk2 (516S)  | 80.5772  | 27.46798146 | 15.8582  |

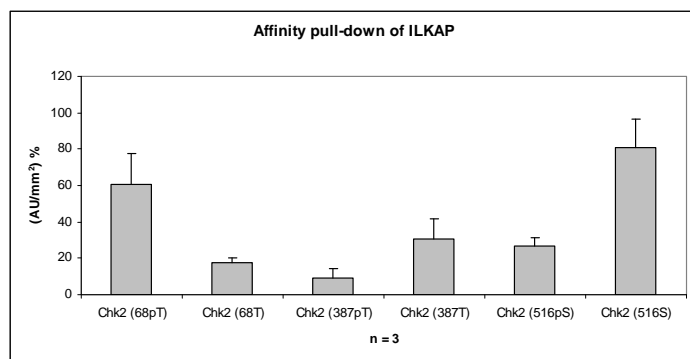

**Table S7.**

| Sample       | AU     | Area (mm <sup>2</sup> ) | AU/mm <sup>2</sup> | (A-B)/mm <sup>2</sup> | %        |
|--------------|--------|-------------------------|--------------------|-----------------------|----------|
| RSK2 (227pS) | 624400 | 14.17                   | 44051.89           | 3394.69               | 12.68885 |
| RSK2 (227S)  | 599622 | 14.17                   | 42303.79           | 1646.58               | 6.154671 |
| RSK2 (369pS) | 594202 | 14.17                   | 41921.4            | 1264.2                | 4.725391 |
| RSK2 (369S)  | 594691 | 14.17                   | 41955.9            | 1298.7                | 4.854347 |
| RSK2 (386pS) | 955490 | 14.17                   | 67410.54           | 26753.34              | 100      |
| RSK2 (386S)  | 615107 | 14.17                   | 43396.27           | 2739.06               | 10.2382  |
| RSK2 (577pT) | 620405 | 14.17                   | 43770.04           | 3112.84               | 11.63533 |
| RSK2 (577T)  | 584772 | 14.17                   | 41256.11           | 598.91                | 2.238636 |
| BckGrn       | 576283 | 14.17                   | 40657.2            | -----                 |          |

| Sample       | AU    | Area (mm <sup>2</sup> ) | AU/mm <sup>2</sup> | (A-B)/mm <sup>2</sup> | %        |
|--------------|-------|-------------------------|--------------------|-----------------------|----------|
| RSK2 (227pS) | 13038 | 16.95                   | 769.11             | 374.88                | 15.4075  |
| RSK2 (227S)  | 9294  | 16.95                   | 548.25             | 154.02                | 6.330196 |
| RSK2 (369pS) | 12917 | 16.95                   | 761.97             | 367.74                | 15.11405 |
| RSK2 (369S)  | 9687  | 16.95                   | 571.44             | 177.21                | 7.283301 |
| RSK2 (386pS) | 38501 | 16.95                   | 2271.17            | 1876.94               | 77.14192 |
| RSK2 (386S)  | 17950 | 16.95                   | 1058.87            | 664.64                | 27.31659 |
| RSK2 (577pT) | 47929 | 16.95                   | 2827.33            | 2433.1                | 100      |
| RSK2 (577T)  | 22021 | 16.95                   | 1299.02            | 904.79                | 37.18672 |
| BckGrn       | 6683  | 16.95                   | 394.23             | -----                 |          |

| Sample       | AU     | Area (mm <sup>2</sup> ) | AU/mm <sup>2</sup> | (A-B)/mm <sup>2</sup> | %        |
|--------------|--------|-------------------------|--------------------|-----------------------|----------|
| RSK2 (227pS) | 374541 | 14.55                   | 25734.18           | 1222.46               | 35.55265 |
| RSK2 (227S)  | 364493 | 14.55                   | 25043.79           | 532.08                | 15.47441 |
| RSK2 (369pS) | 365359 | 14.55                   | 25103.29           | 591.58                | 17.20485 |
| RSK2 (369S)  | 364634 | 14.55                   | 25053.48           | 541.77                | 15.75623 |
| RSK2 (386pS) | 402873 | 14.55                   | 27680.83           | 3169.11               | 92.16682 |
| RSK2 (386S)  | 355982 | 14.55                   | 24459.01           | 1                     | 0.029083 |
| RSK2 (577pT) | 406793 | 14.55                   | 27950.17           | 3438.45               | 100      |
| RSK2 (577T)  | 378650 | 14.55                   | 26016.5            | 1504.79               | 43.76361 |
| BckGrn       | 356749 | 14.55                   | 24511.71           | -----                 |          |

**Sum of experiments**

| Sample       | Average  | SD          | SEM      |
|--------------|----------|-------------|----------|
| Chk2 (68pT)  | 60.50647 | 29.16342348 | 16.83703 |
| Chk2 (68T)   | 17.64863 | 4.132789575 | 2.385999 |
| Chk2 (387pT) | 9.057018 | 9.203823902 | 5.313679 |
| Chk2 (387T)  | 30.80514 | 19.4256716  | 11.2151  |
| Chk2 (516pS) | 26.45452 | 8.894785881 | 5.135261 |
| Chk2 (516S)  | 80.5772  | 27.46798146 | 15.8582  |

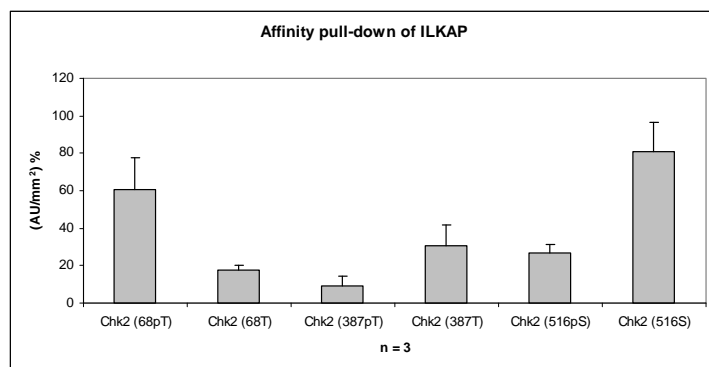

1. U. Doehn, S. Gammeltoft, S. H. Shen and C. J. Jensen, (2004), *p90 ribosomal S6 kinase 2 is associated with and dephosphorylated by protein phosphatase 2C delta*, *Biochem J*, **382**, 425-431.
2. H. Yamaguchi, G. Minopoli, O. N. Demidov, D. K. Chatterjee, C. W. Anderson, S. R. Durell and E. Appella, (2005), *Substrate specificity of the human protein phosphatase 2C delta Wip1*, *Biochemistry*, **44**, 5285-5294.
